# Supplementary material for: Investigating the response of China’s surface ozone concentration to the future changes of multiple factors
Source: Copernicus journal article supplement (doi:10.5194/egusphere-2024-2713), 2024-10-10
Supplement: Supplementary file 1 [file egusphere-2024-2713-supplement.pdf]

1 **Supplement of**  
2 **Investigating the response of China's surface ozone concentration to**  
3 **the future changes of multiple factors**

4 Jinya Yang<sup>1</sup>, Yutong Wang<sup>1</sup>, Lei Zhang<sup>1,2</sup>, Yu Zhao<sup>1,2\*</sup>

5  
6 1. State Key Laboratory of Pollution Control and Resource Reuse, School of  
7 Environment, Nanjing University, 163 Xianlin Rd., Nanjing, Jiangsu 210023, China

8 2. Jiangsu Collaborative Innovation Center of Atmospheric Environment and  
9 Equipment Technology (CICAET), Nanjing University of Information Science and  
10 Technology, Jiangsu 210044, China

11  
12 \*Corresponding author: Yu Zhao

13 Phone: 86-25-89680650; email: [yuzhao@nju.edu.cn](mailto:yuzhao@nju.edu.cn)

14  
15

16 **Number of tables: 2      Number of figures: 7**

17 **Table list**

18 Table S1 Statistical metrics for comparison between the observed and simulated  
19 monthly average meteorological variables and MDA8 O<sub>3</sub> in 2020. OBS is mean of  
20 observation, SIM is mean of simulation, and Bias is mean bias between SIM and OBS. R,  
21 NMB, NME and IOA refers to the correlation coefficient, normalized mean bias,  
22 normalized mean error and index of agreement between SIM and OBS, respectively.

23 Table S2 Comparison of BVOCs estimates between this study and previous estimations  
24 for 2020.

25 **Figure list**

26 Figure S1 The NO<sub>x</sub> and NMVOCs emissions in 2020 and 2060 for the surrounding  
27 areas within the modelling domain but excluding Chinese mainland (SURR), Chinese  
28 mainland (CHN), as well as the three regions. Data illustrated are obtained from MEIC  
29 for 2020 and DPEC for 2060 within Chinese mainland, and SSP dataset for the rest.

30 Figure S2 Spatial distribution of the observation (circles) and simulation (shaded) of  
31 monthly average MDA8 O<sub>3</sub> in 2020 across China.

32 Figure S3 The spatial distribution of BVOCs emissions of the 2020s and the difference  
33 between the 2060s and 2020s.

34 Figure S4 The distribution of O<sub>3</sub> seasons across China and the three regions, and the  
35 top six months with the highest levels of O<sub>3</sub> pollution are covered by darker color. Note  
36 that there is discrepancy between simulation and observation in PRD for 2020s.  
37 February and March are simulated as two of the six most polluted months, while the  
38 observation indicates April and May.

39 Figure S5 The emission reduction rates for the two precursors during 2020 and 2060  
40 over China and the three regions.

41 Figure S6 Simulation and projection of hourly O<sub>3</sub> and O<sub>x</sub> in the 2020s and 2060s over  
42 China and the three regions.

43 Figure S7 Projected seasonal O<sub>3</sub> exceedance over the east of China in the 2020s and  
44 2060s, and the exceedance changes when the four factors at 2060s level.

45

46 **Tables**

47 Table S1 Statistical metrics for comparison between the observed and simulated  
 48 monthly average meteorological variables and MDA8 O<sub>3</sub> in 2020. OBS is mean of  
 49 observation, SIM is mean of simulation, and Bias is mean bias between SIM and OBS. R,  
 50 NMB, NME and IOA refers to the correlation coefficient, normalized mean bias,  
 51 normalized mean error and index of agreement between SIM and OBS, respectively.

| Variables                       | OBS    | SIM    | Bias  | R    | NMB     | NME     | IOA  |
|---------------------------------|--------|--------|-------|------|---------|---------|------|
| T2 (°C)                         | 13.21  | 12.53  | -0.69 | 0.96 | -5.20 % | 17.65 % | 0.98 |
| WS (m s <sup>-1</sup> )         | 2.60   | 4.02   | 1.41  | 0.51 | 54.21 % | 60.04 % | 0.57 |
| WD (°)                          | 175.75 | 174.78 | -0.97 | 0.51 | -0.55 % | 18.40 % | 0.72 |
| RH (%)                          | 65.25  | 66.17  | 0.92  | 0.78 | 1.41 %  | 12.78 % | 0.88 |
| MDA8<br>O <sub>3</sub><br>(ppb) | 57.45  | 8.11   | 8.11  | 0.71 | 14.12 % | 16.33 % | 0.74 |
| Warm<br>season                  | 38.67  | 4.21   | 4.21  | 0.32 | 10.90 % | 25.48 % | 0.49 |
| Non-<br>warm<br>season          |        |        |       |      |         |         |      |

52

53 Table S2 Comparison of BVOCs estimates between this study and previous estimations.

| Species     | Period    | Annual emission<br>(Tg) | Reference          |
|-------------|-----------|-------------------------|--------------------|
| Total BVOCs | 2020s     | 33.55                   | This study         |
|             | 2015–2019 | 29.28±0.91              | Ma et al. (2021)   |
|             | 2015–2019 | 31.42±0.95              | Ma et al. (2021)   |
|             | 2008–2018 | 54.60                   | Li et al. (2020)   |
|             | 2001–2016 | 34.27                   | Wang et al. (2021) |
|             | 2017      | 23.54                   | Wu et al. (2020)   |
| Isoprene    | 2020s     | 21.08                   | This study         |
|             | 2015–2019 | 13.88±0.57              | Ma et al. (2021)   |
|             | 2015–2019 | 14.29±0.54              | Ma et al. (2021)   |
|             | 2008–2018 | 29.30                   | Li et al. (2020)   |
|             | 2001–2016 | 15.94                   | Wang et al. (2021) |
|             | 2017      | 13.30                   | Wu et al. (2020)   |
| Terpenes    | 2020s     | 3.30                    | This study         |
|             | 2015–2019 | 5.28±0.12               | Ma et al. (2021)   |
|             | 2015–2019 | 4.77±0.11               | Ma et al. (2021)   |
|             | 2017      | 3.09                    | Wu et al. (2020)   |

54



55 **Figures**

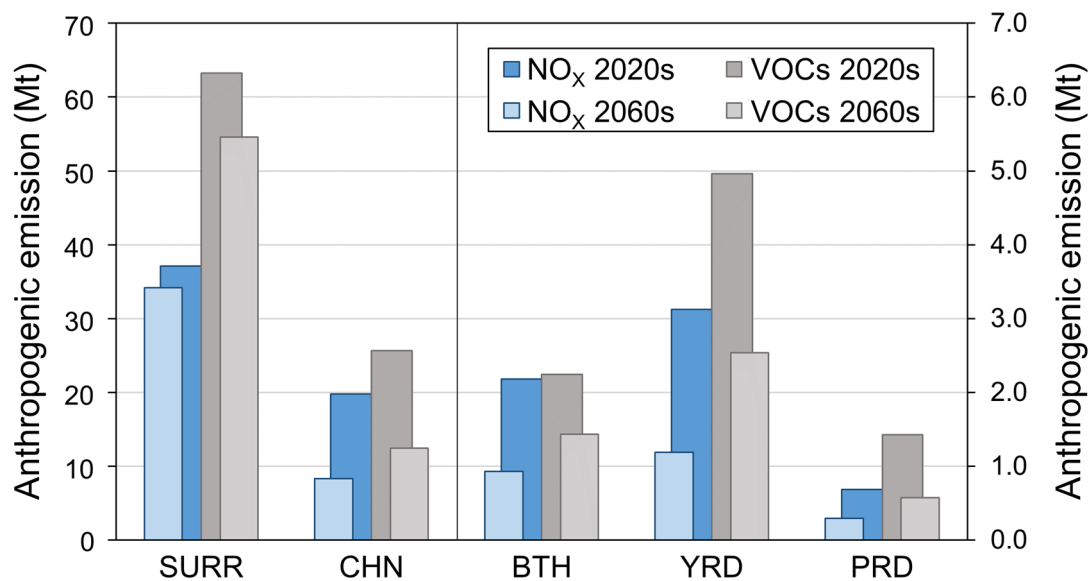

56 Figure S1 The NO<sub>x</sub> and NMVOCs emissions in 2020 and 2060 for the surrounding  
 57 areas within the modelling domain but excluding Chinese mainland (SURR), Chinese  
 58 mainland (CHN), as well as the three regions. Data illustrated are obtained from MEIC  
 59 for 2020 and DPEC for 2060 within Chinese mainland, and SSP dataset for the rest.

60

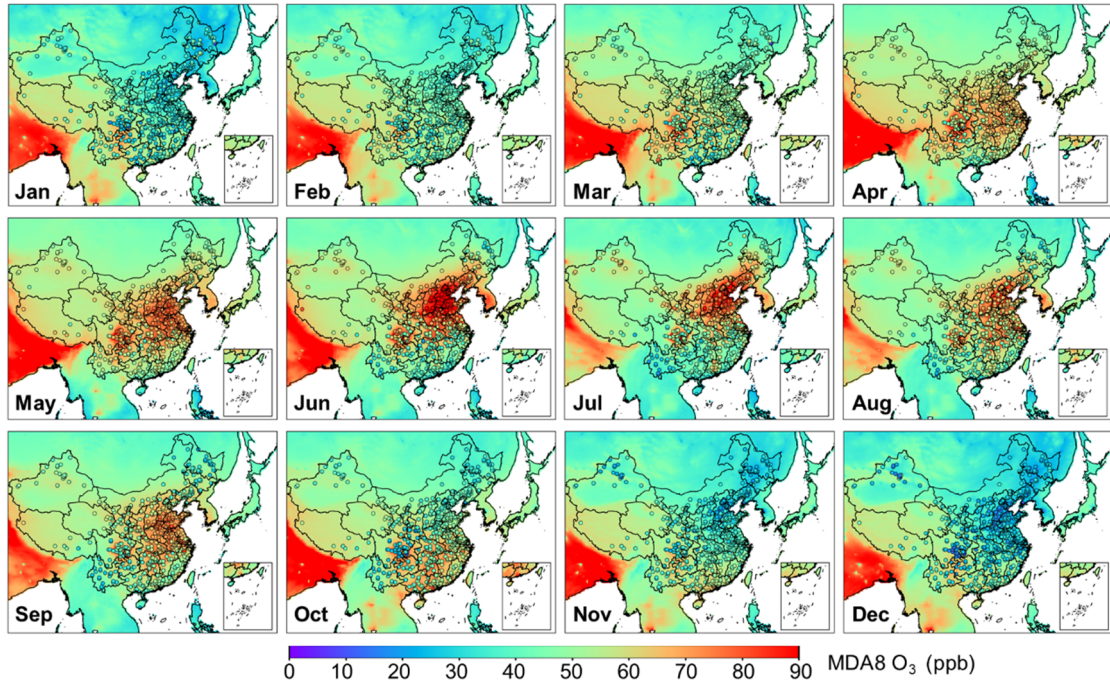

61

62 Figure S2 Spatial distribution of the observation (circles) and simulation (shaded) of  
 63 monthly average MDA8 O<sub>3</sub> in 2020 across China.

64

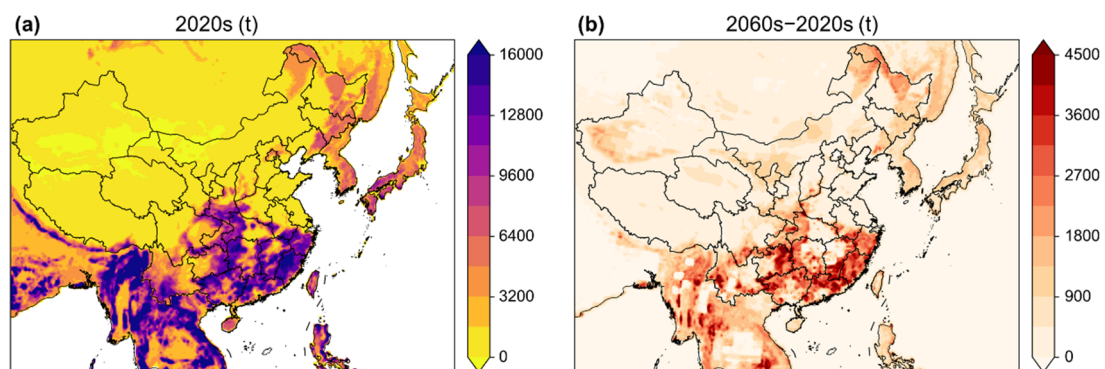

65

66 Figure S3 The spatial distribution of BVOCs emissions of the 2020s and the difference  
67 between the 2060s and 2020s.

68

69

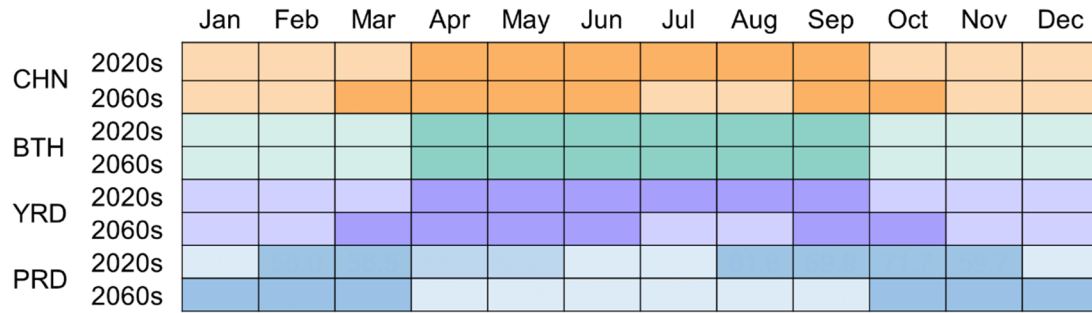

70 Figure S4 The distribution of O<sub>3</sub> seasons across China and the three regions, and the  
71 top six months with the highest levels of O<sub>3</sub> pollution are covered by darker color. Note  
72 that there is discrepancy between simulation and observation in PRD for 2020s.  
73 February and March are simulated as two of the six most polluted months, while the  
74 observation indicates April and May.

75

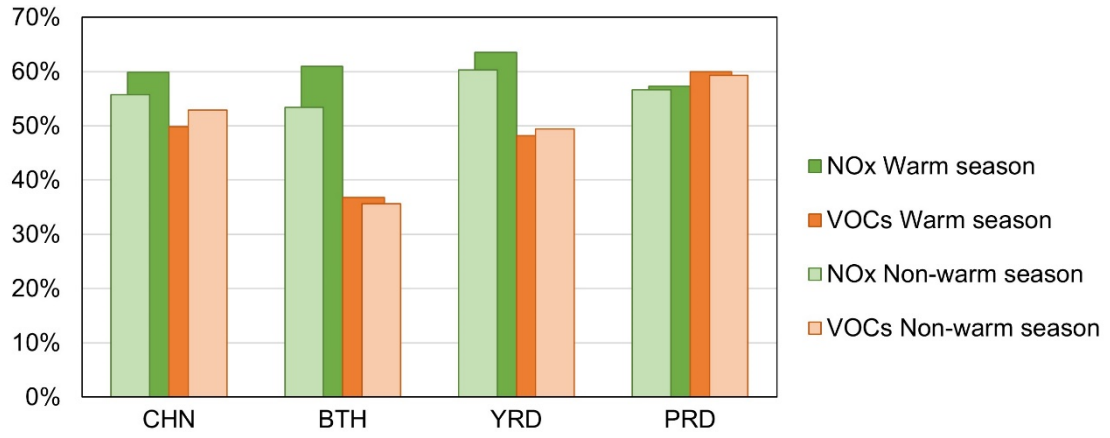

76 Figure S5 The emission reduction rates for the two precursors during 2020 and 2060  
 77 over China and the three regions.

78

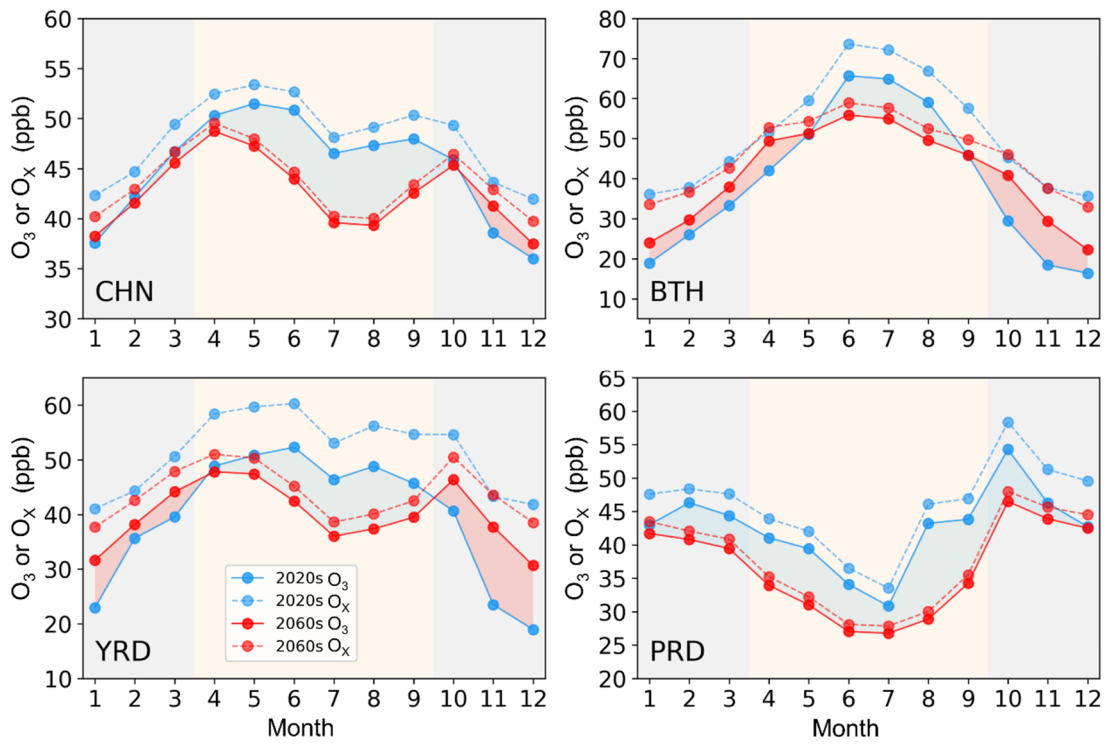

79 Figure S6 Simulation and projection of hourly O<sub>3</sub> and O<sub>x</sub> in the 2020s and 2060s over  
 80 China and the three regions.

81

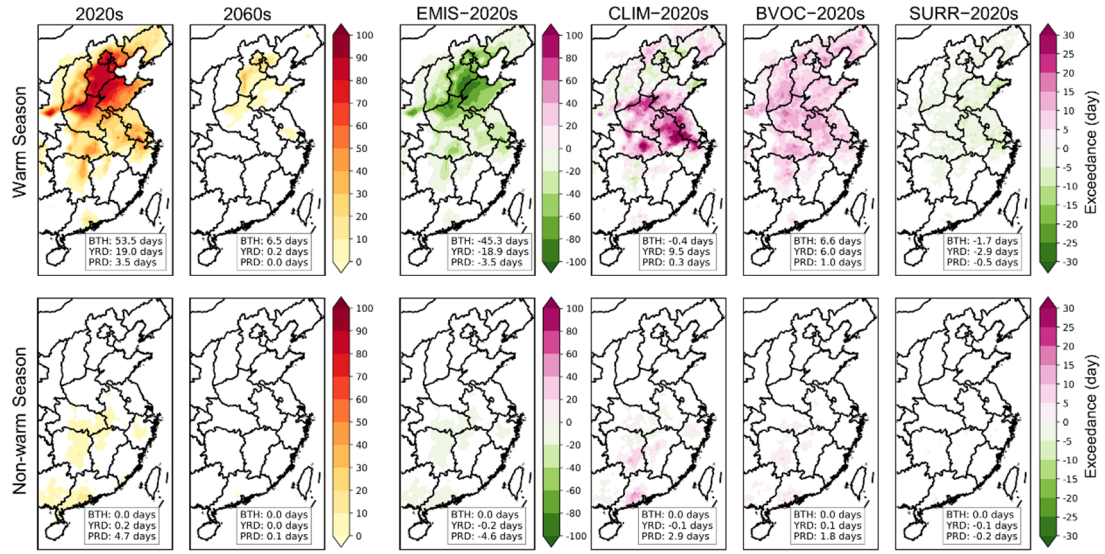

82 Figure S7 Projected seasonal O<sub>3</sub> exceedance over the east of China in the 2020s and  
 83 2060s, and the exceedance changes when the four factors at 2060s level.

84

## 85 **References**

- 86 Li, L., Yang, W., Xie, S., and Wu, Y.: Estimations and uncertainty of biogenic volatile  
87 organic compound emission inventory in China for 2008-2018, *Science of the Total*  
88 *Environment*, 733, 139301, 10.1016/j.scitotenv.2020.139301, 2020.
- 89 Ma, M., Gao, Y., Ding, A., Su, H., Liao, H., Wang, S., Wang, X., Zhao, B., Zhang, S.,  
90 Fu, P., Guenther, A. B., Wang, M., Li, S., Chu, B., Yao, X., and Gao, H.: Development  
91 and Assessment of a High-Resolution Biogenic Emission Inventory from Urban Green  
92 Spaces in China, *Environmental Science & Technology*, 10.1021/acs.est.1c06170, 2021.
- 93 Wang, H., Wu, Q., Guenther, A. B., Yang, X., Wang, L., Xiao, T., Li, J., Feng, J., Xu,  
94 Q., and Cheng, H.: A long-term estimation of biogenic volatile organic compound  
95 (BVOC) emission in China from 2001–2016: the roles of land cover change and climate  
96 variability, *Atmospheric Chemistry and Physics*, 21, 4825-4848, 10.5194/acp-21-4825-  
97 2021, 2021.
- 98 Wu, K., Yang, X., Chen, D., Gu, S., Lu, Y., Jiang, Q., Wang, K., Ou, Y., Qian, Y., Shao,  
99 P., and Lu, S.: Estimation of biogenic VOC emissions and their corresponding impact  
100 on ozone and secondary organic aerosol formation in China, *Atmospheric Research*,  
101 231, 10.1016/j.atmosres.2019.104656, 2020.
